# Supplementary material for: Acetylene hydrochlorination over 13X zeolite catalysts at high temperature
Source: Royal Society of Chemistry journal article supplement (doi:10.1039/c6gc02291j), 2016-01-01
Supplement: c6gc02291j1.pdf [file c6gc02291j1.pdf]

## **Acetylene hydrochlorination over 13X zeolite catalyst at high temperature**

Zhijia Song,<sup>ab</sup> Guangye Liu,<sup>a</sup> Dawei He,<sup>ab</sup> Xiaodong Pang,<sup>c</sup> Yansi Tong,<sup>ab</sup> Yaqi Wu,<sup>ab</sup>  
Danhua Yuan,<sup>a</sup> Zhongmin Liu<sup>\*a</sup> and Yunpeng Xu<sup>\*a</sup>

<sup>a</sup>National Engineering Laboratory for Methanol to Olefins, Dalian National Laboratory for Clean Energy, Dalian Institute of Chemical Physics, Chinese Academy of Sciences, Dalian 116023, P. R. China. E-mail: [liuzm@dicp.ac.cn](mailto:liuzm@dicp.ac.cn); [xuyp@dicp.ac.cn](mailto:xuyp@dicp.ac.cn)

<sup>b</sup>University of Chinese Academy of Sciences, Beijing 100049, P. R. China

<sup>c</sup>Tianye (Group) Co., Ltd, Shihezi, Xinjiang 832000, China.

## **Electronic Supplementary Information**

## Catalyst preparation

Catalysts used in the experiments all were commercial available. Zeolite 13X ( $\text{SiO}_2/\text{Al}_2\text{O}_3 = 2.34$ ) was bought from Jiangsu ALSIO Technology Co., Ltd.. Other zeolites such as USY ( $\text{SiO}_2/\text{Al}_2\text{O}_3 = 8.92$ ), Beta ( $\text{SiO}_2/\text{Al}_2\text{O}_3 = 24.57$ ), MOR ( $\text{SiO}_2/\text{Al}_2\text{O}_3 = 14.40$ ) and ZSM-5 ( $\text{SiO}_2/\text{Al}_2\text{O}_3 = 35.53$ ) were provided by Nankai University; and they were ion exchanged with NaCl aqueous solution at room temperature for 24 h. Coconut shell activated carbon (AC) was gotten from Shaowu Chem., Zhejiang.

## Catalytic performance evaluation

Sketch of the catalytic experimental setup was listed below.

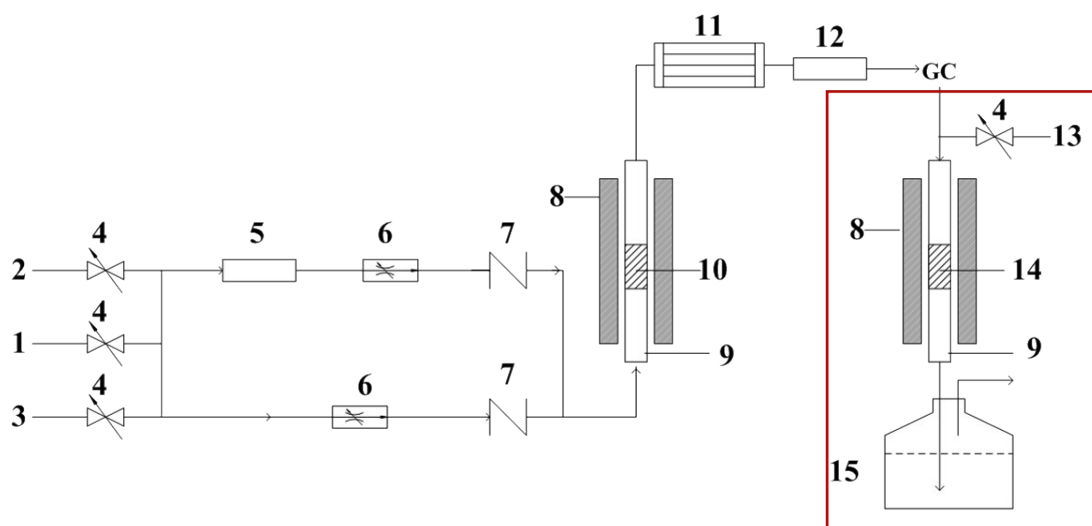

1. Nitrogen, 2. Acetylene, 3. Hydrogen chloride, 4. Relief valve, 5. Dry pipe (silicagel), 6. Mass flowmeter, 7. One-way check valve, 8. Furnace, 9. Reactor, 10. Catalyst bed, 11. Cold trap (0-5°C), 12. Dry pipe ( $\text{CaCl}_2$ ), 13. Air, 14. Combustion catalyst, 15. NaOH aqueous solution. (The flow rate of air was 400-500 ml/min, the combustion temperature was 450 °C)

Analysis conditions were as follows: Agilent 7890A GC; capillary column Agilent 19095P-Q04: 50 m  $\times$  530  $\mu\text{m}$   $\times$  40  $\mu\text{m}$ ; inlet temperature, 200 °C; split ratio, 30:1; column temperature, 210 °C; detector type, flame ionization detector (FID); detector and vaporizer temperature, 300 °C.

## Characterization

The on-line mass spectra was performed on an Omnistar GSD320 (Pfeiffer Vacuum, Germany) mass spectrometer. The X-ray diffraction (XRD) patterns were recorded on a PANalytical X'Pert PRO X-ray diffractometer using the Cu-K $\alpha$  radiation ( $\lambda = 1.54059 \text{ \AA}$ ), operating at 40 kV and 40 mA. The thermogravimetry analysis was carried out on a TA Q-600 analyzer from room temperature to 800 °C at a heating rate of 10 °C/min in an air flow of 100 ml/min. The total carbon content in the catalysts after reaction was determined using an instrument for total organic carbon analysis (Shimadzu TOC-L CPH) with a solid sample module (SSM-5000A). The temperature of the total carbon combustion tube of the SSM-5000A was 900 °C. Approximately 100 mg of solid sample was loaded in a ceramic sample boat and analyzed by further combustion. The chemical composition of the solid samples was determined with a Philips Magix-601 X-ray fluorescence (XRF) spectrometer. Textural properties of catalysts were determined by N<sub>2</sub> adsorption-desorption isotherms at 77 K on a Micromeritics ASAP 2020 system. The total surface area was calculated based on the BET equation, and the micropore surface area was evaluated using the t-plot method. <sup>13</sup>C solid NMR spectra were performed on a Bruker AvanceIII 600 spectrometer equipped with a 14.1 T wide-bore magnet using a 4 mm or 7 mm MAS probe. The resonance frequency was 150.9 MHz for <sup>13</sup>C.

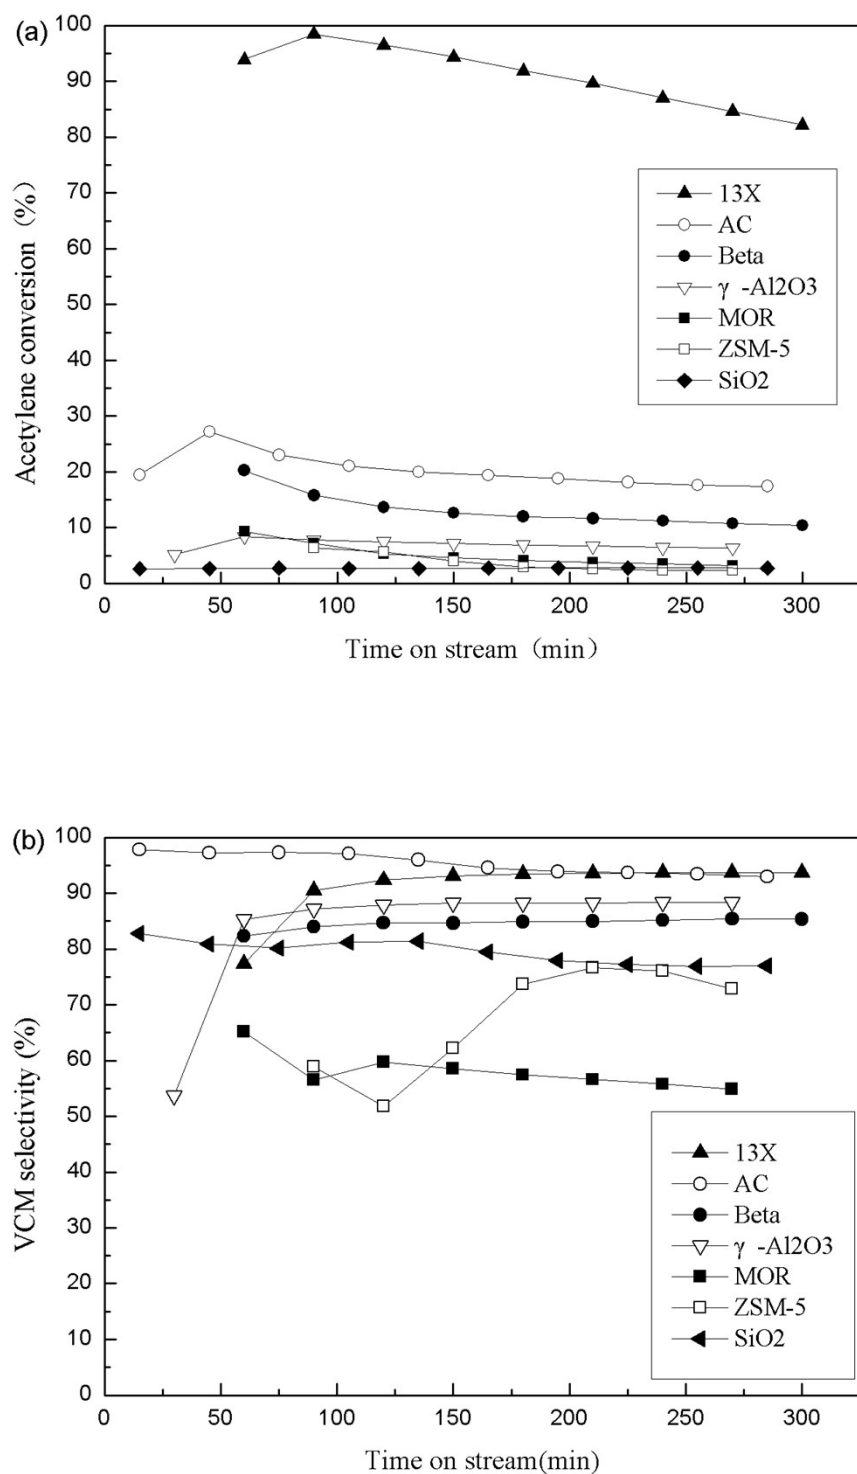

**Fig. S1** Catalytic performances of different catalysts in acetylene hydrochlorination.  
Reaction conditions: reactor set point temperature = 320 °C.

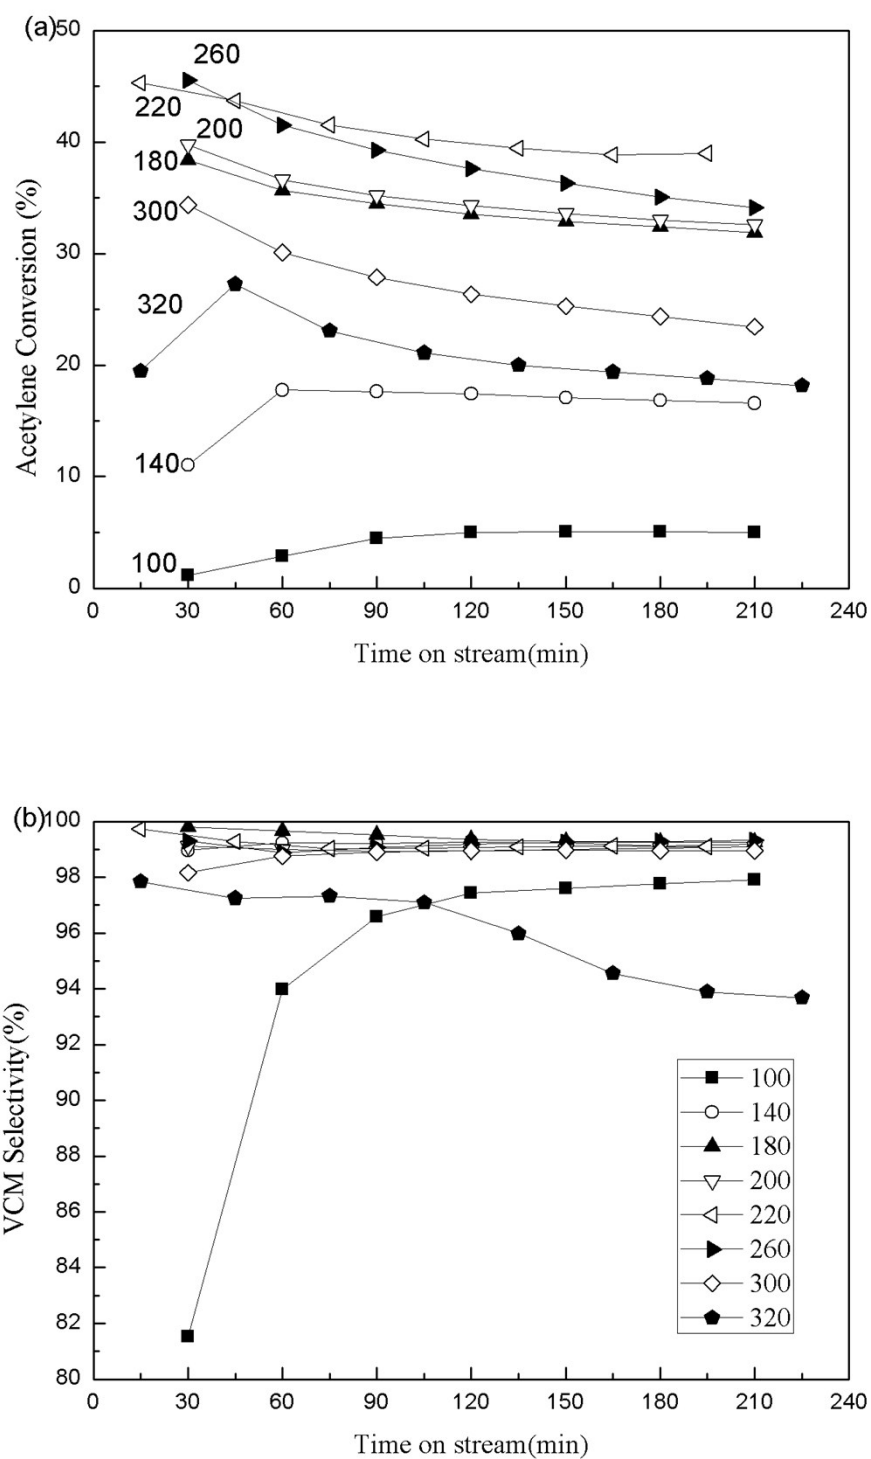

**Fig. S2** Influence of temperature on catalytic activity in AC catalyzed acetylene hydrochlorination.

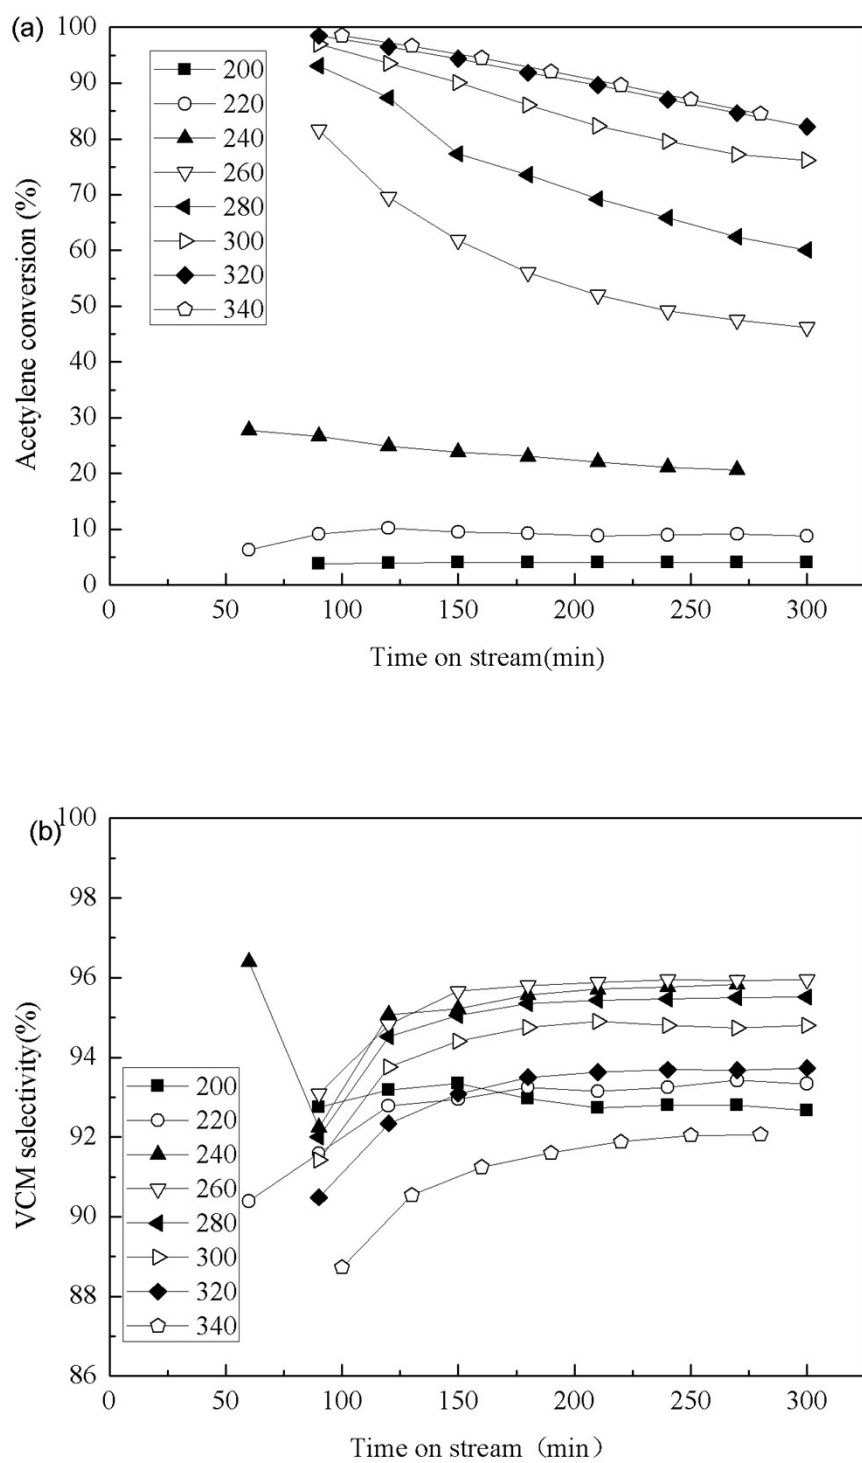

**Fig. S3** Influence of temperature on catalytic activity in 13X catalyzed acetylene hydrochlorination.

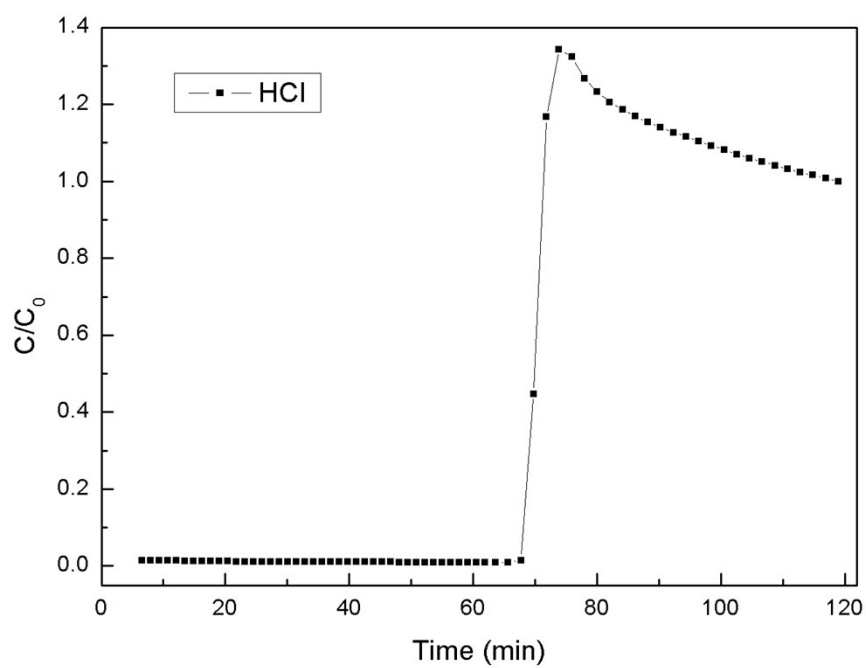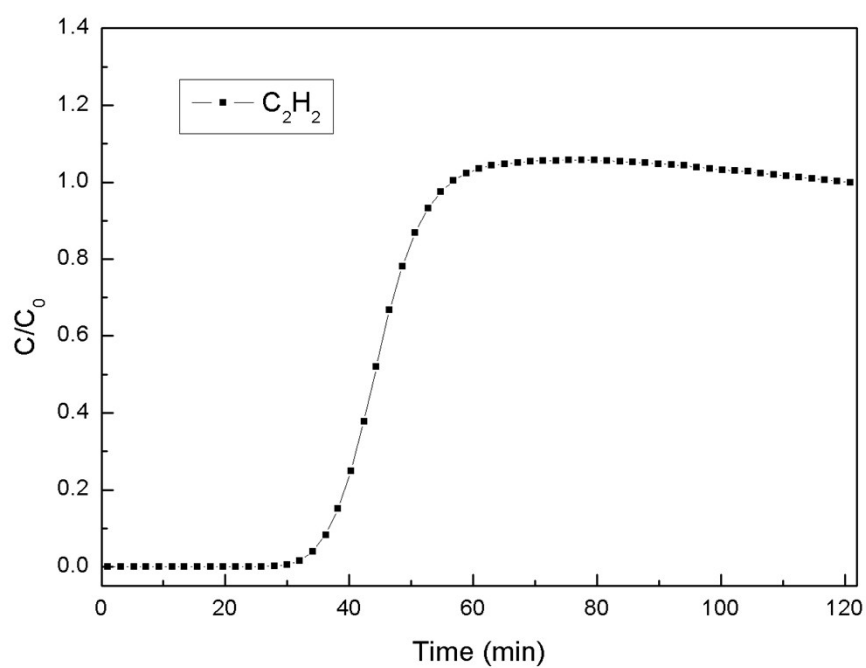

**Fig. S4** The breakthrough curves of HCl (12ml/min) and  $C_2H_2$  (10ml/min) in the reactor packed with 10 ml of 13X under reaction conditions (reactor set point temperature = 320 °C, the breakthrough curve was determined individually).

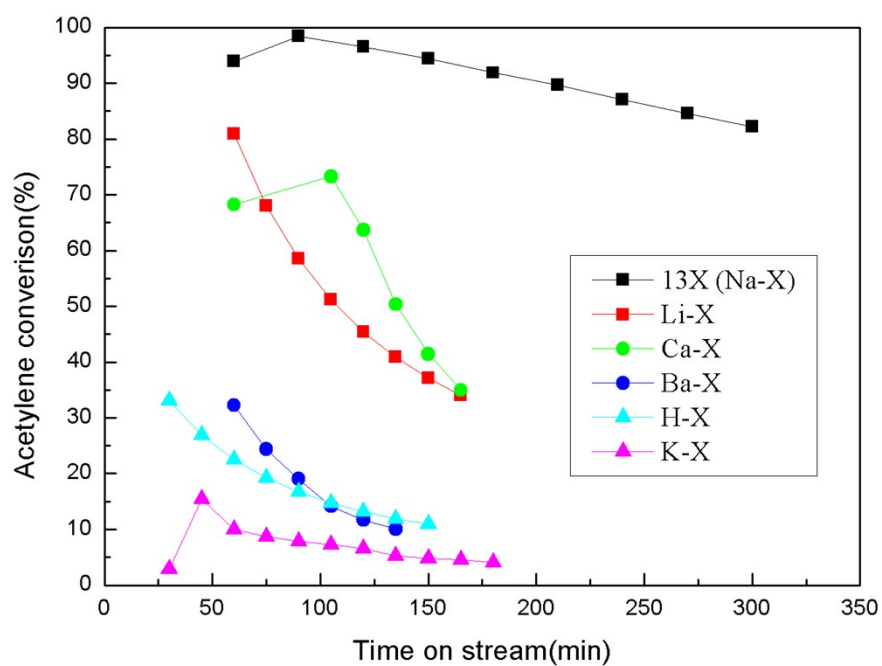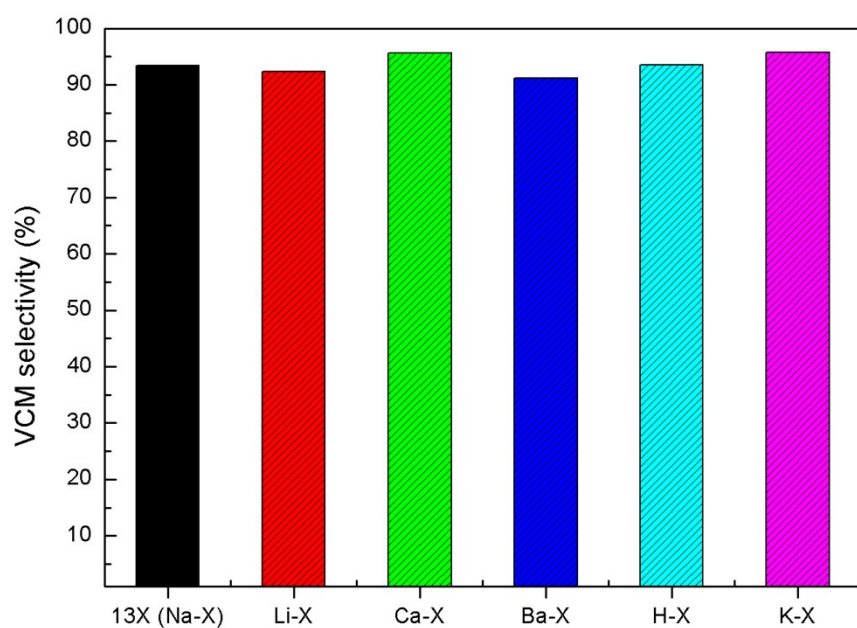

**Fig. S5** Catalytic performances of X zeolites with different types of cation in acetylene hydrochlorination. Reaction conditions: reactor set point temperature = 320 °C

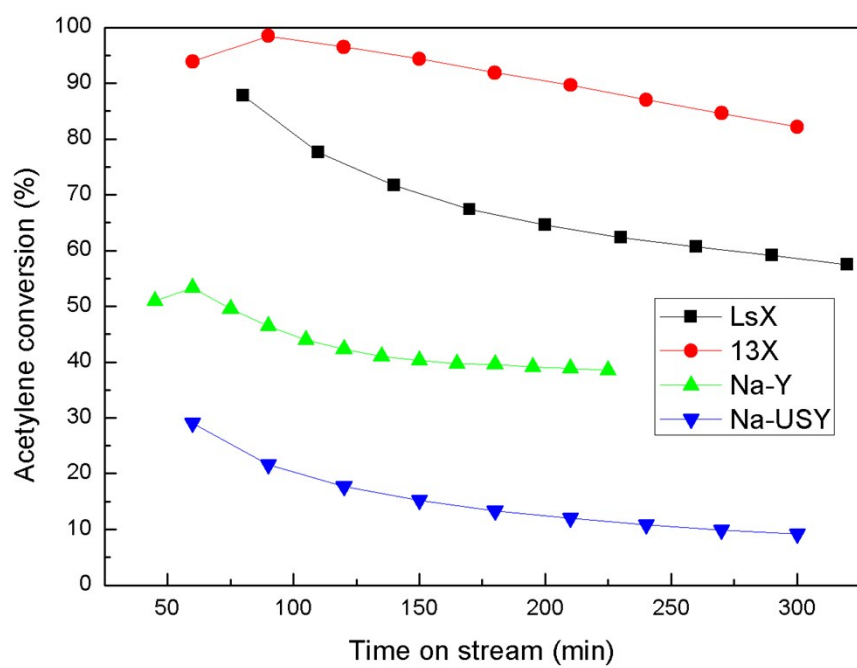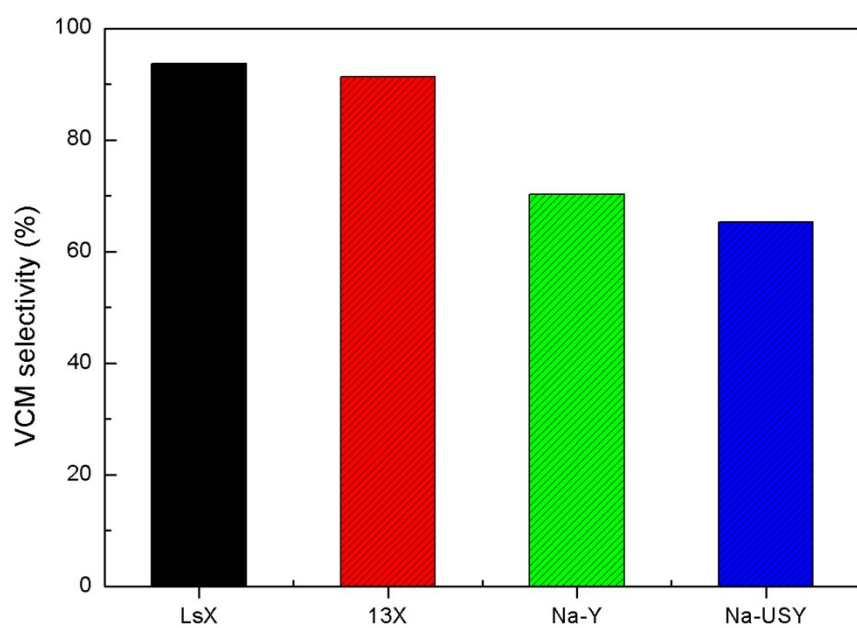

**Fig. S6** Catalytic performances of faujasite zeolites with different  $\text{SiO}_2/\text{Al}_2\text{O}_3$  ratio in acetylene hydrochlorination. Reaction conditions: reactor set point temperature = 320 °C.

**Table S1** Chemical compositions of X zeolites<sup>a</sup>.

| Sample     | SiO <sub>2</sub> /Al <sub>2</sub> O <sub>3</sub> ratio <sup>b</sup> | Na <sub>2</sub> O/Al <sub>2</sub> O <sub>3</sub> ratio <sup>b</sup> |
|------------|---------------------------------------------------------------------|---------------------------------------------------------------------|
| 13X (Na-X) | 2.82                                                                | 0.92                                                                |
| Li-X       | 2.95                                                                | 0.10                                                                |
| Ca-X       | 2.94                                                                | 0.04                                                                |
| Ba-X       | 2.90                                                                | 0.11                                                                |
| H-X        | 2.86                                                                | 0.19                                                                |
| K-X        | 2.90                                                                | 0.05                                                                |

<sup>a</sup> X zeolites with different cation types were obtained by ion exchange of 13X. <sup>b</sup> SiO<sub>2</sub>/Al<sub>2</sub>O<sub>3</sub> ratio and Na<sub>2</sub>O/Al<sub>2</sub>O<sub>3</sub> ratio were received by XRF.

**Table S2** Chemical compositions of faujasite zeolites.

| Sample              | SiO <sub>2</sub> /Al <sub>2</sub> O <sub>3</sub> ratio <sup>a</sup> | Na <sub>2</sub> O/Al <sub>2</sub> O <sub>3</sub> ratio <sup>a</sup> |
|---------------------|---------------------------------------------------------------------|---------------------------------------------------------------------|
| LsX                 | 2.07                                                                | 0.80                                                                |
| 13X                 | 2.82                                                                | 0.92                                                                |
| Na-Y <sup>b</sup>   | 7.44                                                                | 0.47                                                                |
| Na-USY <sup>b</sup> | 8.92                                                                | 0.31                                                                |

<sup>a</sup> SiO<sub>2</sub>/Al<sub>2</sub>O<sub>3</sub> ratio and Na<sub>2</sub>O/Al<sub>2</sub>O<sub>3</sub> ratio were received by XRF.

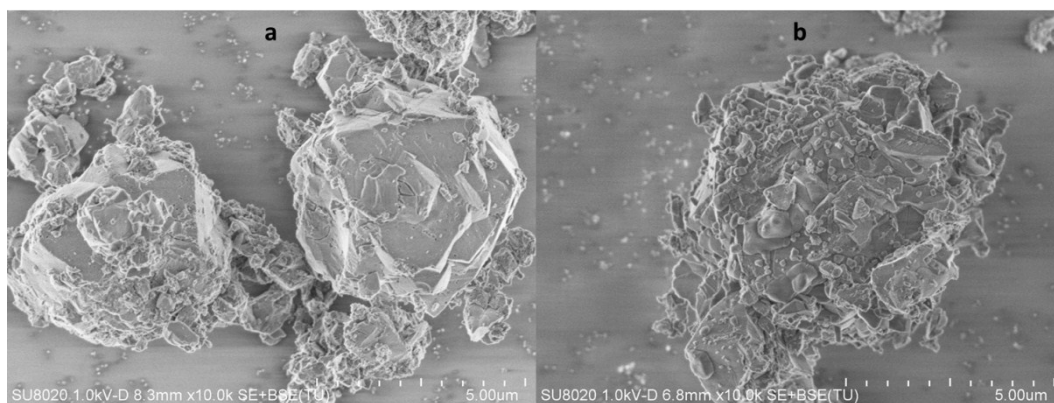

**Fig. S7** The SEM images of the fresh (a) and spent (b) 13X catalysts.

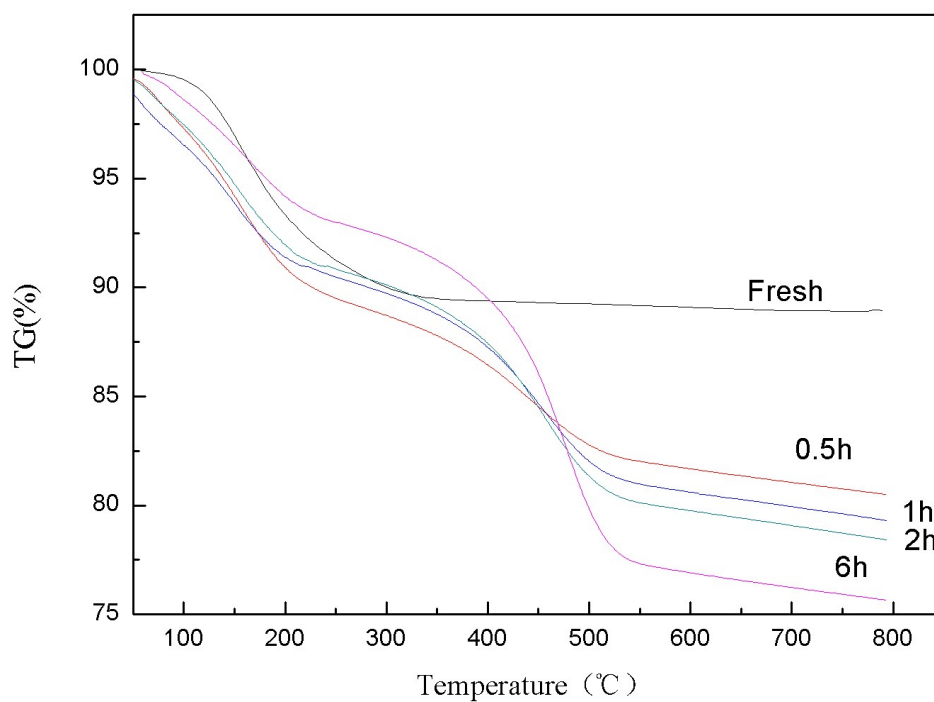

**Fig. S8** TG curves of fresh catalyst and catalysts reacted after different times.

Reaction conditions: reactor set point temperature = 320 °C.

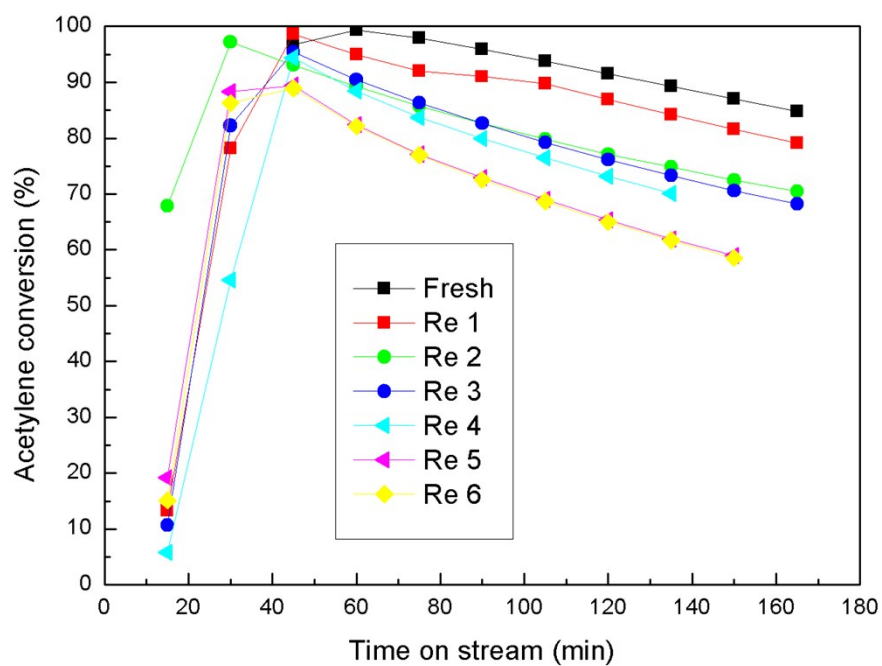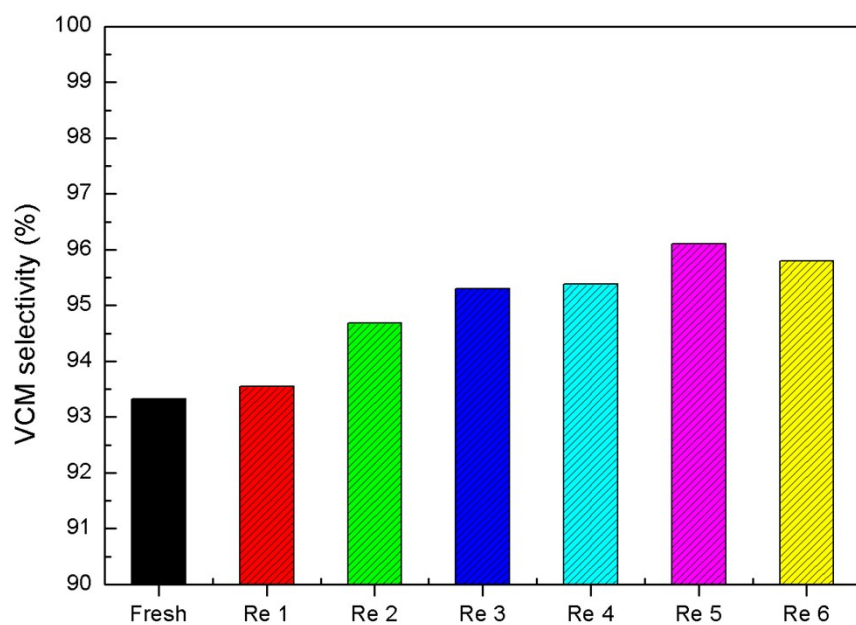

**Fig. S9** Catalytic performances of fresh and regenerated spherical 13X catalysts.

Reaction conditions: reactor set point temperature = 320 °C.

Regeneration of spherical 13X catalyst was also conducted by the same method

as mentioned before.

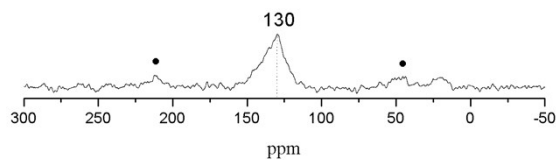

**Fig. S10**  $^{13}\text{C}$  CP MAS NMR spectra of 13X catalyst reacted 9h. ● denotes spinning sideband. Reaction conditions: reactor set point temperature = 320 °C.

The  $^{13}\text{C}$  CP MAS NMR spectra of deactivated catalyst indicated that aromatics (130ppm) were the main cokes species.
